# Supplementary material for: Stability of Vocational Interests During University Studies
Source: Atypon-hosted journal article supplement (doi:10.1027/1614-0001/a000392), 2023-04-05
Supplement: 1614-0001_a000392_esm1.pdf [file 1614-0001_a000392_esm1.pdf]

## Electronic Supplementary Material 1 for

Ertl, B., Hartmann, F. G., & Wunderlich, A. (2023). Stability of Vocational Interests During University Studies. *Journal of Individual Differences*. <https://doi.org/10.1027/1614-0001/a000392>

Supplement E1: Sample of the study with respect to gender and study area.

| Subject area |  | Gender |        | Total |
|--------------|--|--------|--------|-------|
|              |  | male   | female |       |
| STEM-L       |  | 1319   | 346    | 1665  |
| STEM-M       |  | 513    | 992    | 1505  |
| MED          |  | 117    | 242    | 359   |
| ECO          |  | 262    | 416    | 678   |
| Edu          |  | 41     | 370    | 411   |
| Lang         |  | 190    | 1069   | 1259  |
| Total        |  | 2442   | 3435   | 5877  |

## Supplement E2: Ns, Means and Standard deviations for the values at wave 1 and wave 9 for the sample of the study

| Gender |                                      | N    | Mean  | Std. Deviation |
|--------|--------------------------------------|------|-------|----------------|
| male   | Realistic Interests Wave 1           | 2440 | 3.252 | 0.930          |
|        | Realistic Interests Wave 9           | 2441 | 3.335 | 0.917          |
|        | Investigative Interests Wave 1       | 2441 | 3.348 | 0.851          |
|        | Investigative Interests Wave 9       | 2441 | 3.270 | 0.879          |
|        | Artistic Interests Wave 1            | 2442 | 2.383 | 0.834          |
|        | Artistic Interests Wave 9            | 2442 | 2.271 | 0.832          |
|        | Social Interests Wave 1              | 2441 | 3.230 | 0.875          |
|        | Social Interests Wave 9              | 2439 | 3.138 | 0.826          |
|        | Enterprising Interests Wave 1        | 2442 | 3.363 | 0.743          |
|        | Enterprising Interests Wave 9        | 2442 | 3.110 | 0.750          |
|        | Conventional Interests Wave 1        | 2442 | 2.677 | 0.764          |
|        | Conventional Interests Wave 9        | 2442 | 2.606 | 0.799          |
|        | Congruence (Wave 9)                  | 1801 | 0.902 | 0.330          |
|        | Profile correlation (z-standardized) | 2442 | 0.981 | 0.550          |
|        | Study persistence initial course     | 2442 | 0.636 | 0.481          |
| female | Realistic Interests Wave 1           | 3434 | 2.609 | 0.819          |
|        | Realistic Interests Wave 9           | 3433 | 2.728 | 0.831          |
|        | Investigative Interests Wave 1       | 3433 | 3.039 | 0.937          |
|        | Investigative Interests Wave 9       | 3434 | 2.864 | 0.919          |
|        | Artistic Interests Wave 1            | 3434 | 3.155 | 0.948          |
|        | Artistic Interests Wave 9            | 3435 | 2.954 | 0.966          |
|        | Social Interests Wave 1              | 3434 | 3.894 | 0.809          |
|        | Social Interests Wave 9              | 3433 | 3.758 | 0.800          |
|        | Enterprising Interests Wave 1        | 3434 | 3.404 | 0.719          |
|        | Enterprising Interests Wave 9        | 3435 | 3.055 | 0.738          |
|        | Conventional Interests Wave 1        | 3432 | 2.817 | 0.784          |
|        | Conventional Interests Wave 9        | 3434 | 2.781 | 0.809          |
|        | Congruence (Wave 9)                  | 2937 | 0.816 | 0.321          |
|        | Profile correlation (z-standardized) | 3434 | 0.988 | 0.566          |
|        | Study persistence initial course     | 3435 | 0.636 | 0.481          |

Supplement E3a: Effect sizes for the differences between the correlations of the different samples for the different dimensions

| <b>Dimension</b>     | <b>Sample 1</b> | <b>Sample 2</b> | <b>Corr. 1</b> | <b>Corr. 2</b> | <b>Cohen's q<sup>a</sup></b> | <b>Effect size<sup>b</sup></b> |
|----------------------|-----------------|-----------------|----------------|----------------|------------------------------|--------------------------------|
| <b>Realistic</b>     | Total           | Male            | .647           | .638           | .015                         | -                              |
|                      | Total           | Female          | .647           | .571           | .121                         | small                          |
|                      | Male            | Female          | .638           | .571           | .106                         | small                          |
| <b>Investigative</b> | Total           | Male            | .641           | .578           | .100                         | small                          |
|                      | Total           | Female          | .641           | .659           | .031                         | -                              |
|                      | Male            | Female          | .578           | .659           | .132                         | small                          |
| <b>Artistic</b>      | Total           | Male            | .715           | .636           | .146                         | small                          |
|                      | Total           | Female          | .715           | .692           | .046                         | -                              |
|                      | Male            | Female          | .636           | .692           | .100                         | small                          |
| <b>Social</b>        | Total           | Male            | .655           | .610           | .075                         | -                              |
|                      | Total           | Female          | .655           | .600           | .091                         | -                              |
|                      | Male            | Female          | .610           | .600           | .016                         | -                              |
| <b>Enterprising</b>  | Total           | Male            | .499           | .521           | .030                         | -                              |
|                      | Total           | Female          | .499           | .486           | .017                         | -                              |
|                      | Male            | Female          | .521           | .486           | .047                         | -                              |
| <b>Conventional</b>  | Total           | Male            | .485           | .507           | .029                         | -                              |
|                      | Total           | Female          | .485           | .461           | .031                         | -                              |
|                      | Male            | Female          | .507           | .461           | .060                         | -                              |

Note: <sup>a</sup>: Non-directional Cohen's q;

<sup>b</sup>: Effect sizes according to Cohen's Thresholds: small effect > .1, medium effect >.3, large effect >.5

Supplement E3b: Effect sizes for the differences between the correlations of the different dimensions for the total sample, male and female students

| Sample        | Dimension 1   | Dimension 2   | Corr. 1 | Corr. 2 | Cohen's q <sup>a</sup> | Effect size <sup>b</sup> |
|---------------|---------------|---------------|---------|---------|------------------------|--------------------------|
| <b>Total</b>  | Realistic     | Investigative | .647    | .641    | .010                   | -                        |
|               | Realistic     | Artistic      | .647    | .715    | .127                   | small                    |
|               | Realistic     | Social        | .647    | .655    | .014                   | -                        |
|               | Realistic     | Enterprising  | .647    | .499    | .222                   | small                    |
|               | Realistic     | Conventional  | .647    | .485    | .241                   | small                    |
|               | Investigative | Artistic      | .641    | .715    | .137                   | small                    |
|               | Investigative | Social        | .641    | .655    | .024                   | -                        |
|               | Investigative | Enterprising  | .641    | .499    | .212                   | small                    |
|               | Investigative | Conventional  | .641    | .485    | .230                   | small                    |
|               | Artistic      | Social        | .715    | .655    | .113                   | small                    |
|               | Artistic      | Enterprising  | .715    | .499    | .349                   | medium                   |
|               | Artistic      | Conventional  | .715    | .485    | .368                   | medium                   |
|               | Social        | Enterprising  | .655    | .499    | .236                   | small                    |
|               | Social        | Conventional  | .655    | .485    | .255                   | small                    |
|               | Enterprising  | Conventional  | .499    | .485    | .018                   | -                        |
| <b>Male</b>   | Realistic     | Investigative | .638    | .578    | .095                   | -                        |
|               | Realistic     | Artistic      | .638    | .636    | .003                   | -                        |
|               | Realistic     | Social        | .638    | .610    | .046                   | -                        |
|               | Realistic     | Enterprising  | .638    | .521    | .177                   | small                    |
|               | Realistic     | Conventional  | .638    | .507    | .196                   | small                    |
|               | Investigative | Artistic      | .578    | .636    | .092                   | -                        |
|               | Investigative | Social        | .578    | .610    | .049                   | -                        |
|               | Investigative | Enterprising  | .578    | .521    | .082                   | -                        |
|               | Investigative | Conventional  | .578    | .507    | .101                   | small                    |
|               | Artistic      | Social        | .636    | .610    | .043                   | -                        |
|               | Artistic      | Enterprising  | .636    | .521    | .174                   | small                    |
|               | Artistic      | Conventional  | .636    | .507    | .193                   | small                    |
|               | Social        | Enterprising  | .610    | .521    | .131                   | small                    |
|               | Social        | Conventional  | .610    | .507    | .150                   | small                    |
|               | Enterprising  | Conventional  | .521    | .507    | .019                   | -                        |
| <b>Female</b> | Realistic     | Investigative | .571    | .659    | .142                   | small                    |
|               | Realistic     | Artistic      | .571    | .692    | .203                   | small                    |
|               | Realistic     | Social        | .571    | .600    | .044                   | -                        |
|               | Realistic     | Enterprising  | .571    | .486    | .118                   | small                    |
|               | Realistic     | Conventional  | .571    | .461    | .150                   | small                    |
|               | Investigative | Artistic      | .659    | .692    | .061                   | -                        |
|               | Investigative | Social        | .659    | .600    | .098                   | -                        |
|               | Investigative | Enterprising  | .659    | .486    | .260                   | small                    |
|               | Investigative | Conventional  | .659    | .461    | .292                   | small                    |
|               | Artistic      | Social        | .692    | .600    | .159                   | small                    |
|               | Artistic      | Enterprising  | .692    | .486    | .321                   | medium                   |
|               | Artistic      | Conventional  | .692    | .461    | .353                   | medium                   |
|               | Social        | Enterprising  | .600    | .486    | .162                   | small                    |
|               | Social        | Conventional  | .600    | .461    | .195                   | small                    |
|               | Enterprising  | Conventional  | .486    | .461    | .032                   | -                        |

Note: <sup>a</sup>: Non-directional Cohen's q;

<sup>b</sup>: Effect sizes according to Cohen's Thresholds: small effect > .1, medium effect > .3, large effect > .5

## Supplement E3c: Effect sizes for the differences between the correlations of the different dimensions for male students

| Area          | Dimension 1   | Dimension 2   | Corr. 1 | Corr. 2 | Cohen's q <sup>a</sup> | Effect size <sup>b</sup> |
|---------------|---------------|---------------|---------|---------|------------------------|--------------------------|
| <b>STEM-L</b> | Realistic     | Investigative | .547    | .475    | .098                   | -                        |
|               | Realistic     | Artistic      | .547    | .607    | .090                   | -                        |
|               | Realistic     | Social        | .547    | .536    | .016                   | -                        |
|               | Realistic     | Enterprising  | .547    | .502    | .062                   | -                        |
|               | Realistic     | Conventional  | .547    | .444    | .137                   | small                    |
|               | Investigative | Artistic      | .475    | .607    | .188                   | small                    |
|               | Investigative | Social        | .475    | .536    | .082                   | -                        |
|               | Investigative | Enterprising  | .475    | .502    | .035                   | -                        |
|               | Investigative | Conventional  | .475    | .444    | .039                   | -                        |
|               | Artistic      | Social        | .607    | .536    | .106                   | small                    |
|               | Artistic      | Enterprising  | .607    | .502    | .152                   | small                    |
|               | Artistic      | Conventional  | .607    | .444    | .227                   | small                    |
|               | Social        | Enterprising  | .536    | .502    | .047                   | -                        |
|               | Social        | Conventional  | .536    | .444    | .121                   | small                    |
|               | Enterprising  | Conventional  | .502    | .444    | .075                   | -                        |
| <b>STEM-M</b> | Realistic     | Investigative | .583    | .628    | .071                   | -                        |
|               | Realistic     | Artistic      | .583    | .601    | .028                   | -                        |
|               | Realistic     | Social        | .583    | .539    | .064                   | -                        |
|               | Realistic     | Enterprising  | .583    | .502    | .115                   | small                    |
|               | Realistic     | Conventional  | .583    | .547    | .053                   | -                        |
|               | Investigative | Artistic      | .628    | .601    | .043                   | -                        |
|               | Investigative | Social        | .628    | .539    | .135                   | small                    |
|               | Investigative | Enterprising  | .628    | .502    | .186                   | small                    |
|               | Investigative | Conventional  | .628    | .547    | .124                   | small                    |
|               | Artistic      | Social        | .601    | .539    | .092                   | -                        |
|               | Artistic      | Enterprising  | .601    | .502    | .143                   | small                    |
|               | Artistic      | Conventional  | .601    | .547    | .081                   | -                        |
|               | Social        | Enterprising  | .539    | .502    | .051                   | -                        |
|               | Social        | Conventional  | .539    | .547    | .011                   | -                        |
|               | Enterprising  | Conventional  | .502    | .547    | .062                   | -                        |
| <b>Med</b>    | Realistic     | Investigative | .499    | .427    | .092                   | -                        |
|               | Realistic     | Artistic      | .499    | .577    | .110                   | small                    |
|               | Realistic     | Social        | .499    | .480    | .025                   | -                        |
|               | Realistic     | Enterprising  | .499    | .544    | .062                   | -                        |
|               | Realistic     | Conventional  | .499    | .600    | .145                   | small                    |
|               | Investigative | Artistic      | .427    | .577    | .202                   | small                    |
|               | Investigative | Social        | .427    | .480    | .067                   | -                        |
|               | Investigative | Enterprising  | .427    | .544    | .154                   | small                    |
|               | Investigative | Conventional  | .427    | .600    | .237                   | small                    |
|               | Artistic      | Social        | .577    | .480    | .135                   | small                    |
|               | Artistic      | Enterprising  | .577    | .544    | .048                   | -                        |
|               | Artistic      | Conventional  | .577    | .600    | .035                   | -                        |
|               | Social        | Enterprising  | .480    | .544    | .087                   | -                        |
|               | Social        | Conventional  | .480    | .600    | .170                   | small                    |
|               | Enterprising  | Conventional  | .544    | .600    | .083                   | -                        |

|                        |               |               |      |      |      |        |
|------------------------|---------------|---------------|------|------|------|--------|
| <b>Eco</b>             | Realistic     | Investigative | .566 | .470 | .132 | small  |
|                        | Realistic     | Artistic      | .566 | .588 | .033 | -      |
|                        | Realistic     | Social        | .566 | .557 | .013 | -      |
|                        | Realistic     | Enterprising  | .566 | .502 | .090 | -      |
|                        | Realistic     | Conventional  | .566 | .512 | .076 | -      |
|                        | Investigative | Artistic      | .470 | .588 | .165 | small  |
|                        | Investigative | Social        | .470 | .557 | .118 | small  |
|                        | Investigative | Enterprising  | .470 | .502 | .042 | -      |
|                        | Investigative | Conventional  | .470 | .512 | .055 | -      |
|                        | Artistic      | Social        | .588 | .557 | .046 | -      |
|                        | Artistic      | Enterprising  | .588 | .502 | .123 | small  |
|                        | Artistic      | Conventional  | .588 | .512 | .109 | small  |
|                        | Social        | Enterprising  | .557 | .502 | .076 | -      |
|                        | Social        | Conventional  | .557 | .512 | .063 | -      |
|                        | Enterprising  | Conventional  | .502 | .512 | .013 | -      |
| <b>Edu<sup>c</sup></b> | Realistic     | Investigative | .569 | .364 | .265 | small  |
|                        | Realistic     | Artistic      | .569 | .500 | .097 | -      |
|                        | Realistic     | Social        | .569 | .046 | .600 | large  |
|                        | Realistic     | Enterprising  | .569 | .347 | .284 | small  |
|                        | Realistic     | Conventional  | .569 | .658 | .143 | small  |
|                        | Investigative | Artistic      | .364 | .500 | .168 | small  |
|                        | Investigative | Social        | .364 | .046 | .335 | medium |
|                        | Investigative | Enterprising  | .364 | .347 | .019 | -      |
|                        | Investigative | Conventional  | .364 | .658 | .408 | medium |
|                        | Artistic      | Social        | .500 | .046 | .503 | large  |
|                        | Artistic      | Enterprising  | .500 | .347 | .187 | small  |
|                        | Artistic      | Conventional  | .500 | .658 | .240 | small  |
|                        | Social        | Enterprising  | .046 | .347 | .316 | medium |
|                        | Social        | Conventional  | .046 | .658 | .743 | large  |
|                        | Enterprising  | Conventional  | .347 | .658 | .427 | medium |
| <b>Lang</b>            | Realistic     | Investigative | .589 | .593 | .006 | -      |
|                        | Realistic     | Artistic      | .589 | .673 | .140 | small  |
|                        | Realistic     | Social        | .589 | .499 | .128 | small  |
|                        | Realistic     | Enterprising  | .589 | .453 | .188 | small  |
|                        | Realistic     | Conventional  | .589 | .561 | .042 | -      |
|                        | Investigative | Artistic      | .593 | .673 | .134 | small  |
|                        | Investigative | Social        | .593 | .499 | .134 | small  |
|                        | Investigative | Enterprising  | .593 | .453 | .194 | small  |
|                        | Investigative | Conventional  | .593 | .561 | .048 | -      |
|                        | Artistic      | Social        | .673 | .499 | .268 | small  |
|                        | Artistic      | Enterprising  | .673 | .453 | .328 | medium |
|                        | Artistic      | Conventional  | .673 | .561 | .182 | small  |
|                        | Social        | Enterprising  | .499 | .453 | .060 | -      |
|                        | Social        | Conventional  | .499 | .561 | .086 | -      |
|                        | Enterprising  | Conventional  | .453 | .561 | .146 | small  |

Note: <sup>a</sup>: Non-directional Cohen's  $q$ ;

<sup>b</sup>: Effect sizes according to Cohen's Thresholds: small effect  $> .1$ , medium effect  $> .3$ , large effect  $> .5$

<sup>c</sup>: We do not consider male students of education in this analysis because of the low sub-sample size.

Supplement E3d: Effect sizes for the differences between the correlations of the different dimensions for female students

| Area          | Dimension 1   | Dimension 2   | Corr. 1 | Corr. 2 | Cohen's $q^a$ | Effect size <sup>b</sup> |
|---------------|---------------|---------------|---------|---------|---------------|--------------------------|
| <b>STEM-L</b> | Realistic     | Investigative | .513    | .542    | .040          | -                        |
|               | Realistic     | Artistic      | .513    | .587    | .106          | small                    |
|               | Realistic     | Social        | .513    | .563    | .070          | -                        |
|               | Realistic     | Enterprising  | .513    | .511    | .003          | -                        |
|               | Realistic     | Conventional  | .513    | .485    | .037          | -                        |
|               | Investigative | Artistic      | .542    | .587    | .066          | -                        |
|               | Investigative | Social        | .542    | .563    | .030          | -                        |
|               | Investigative | Enterprising  | .542    | .511    | .043          | -                        |
|               | Investigative | Conventional  | .542    | .485    | .077          | -                        |
|               | Artistic      | Social        | .587    | .563    | .036          | -                        |
|               | Artistic      | Enterprising  | .587    | .511    | .109          | small                    |
|               | Artistic      | Conventional  | .587    | .485    | .144          | small                    |
|               | Social        | Enterprising  | .563    | .511    | .073          | -                        |
|               | Social        | Conventional  | .563    | .485    | .108          | small                    |
|               | Enterprising  | Conventional  | .511    | .485    | .035          | -                        |
| <b>STEM-M</b> | Realistic     | Investigative | .503    | .654    | .229          | small                    |
|               | Realistic     | Artistic      | .503    | .676    | .268          | small                    |
|               | Realistic     | Social        | .503    | .563    | .084          | -                        |
|               | Realistic     | Enterprising  | .503    | .489    | .019          | -                        |
|               | Realistic     | Conventional  | .503    | .462    | .053          | -                        |
|               | Investigative | Artistic      | .654    | .676    | .039          | -                        |
|               | Investigative | Social        | .654    | .563    | .145          | small                    |
|               | Investigative | Enterprising  | .654    | .489    | .248          | small                    |
|               | Investigative | Conventional  | .654    | .462    | .282          | small                    |
|               | Artistic      | Social        | .676    | .563    | .184          | small                    |
|               | Artistic      | Enterprising  | .676    | .489    | .287          | small                    |
|               | Artistic      | Conventional  | .676    | .462    | .322          | medium                   |
|               | Social        | Enterprising  | .563    | .489    | .102          | small                    |
|               | Social        | Conventional  | .563    | .462    | .137          | small                    |
|               | Enterprising  | Conventional  | .489    | .462    | .035          | -                        |
| <b>Med</b>    | Realistic     | Investigative | .584    | .490    | .132          | small                    |
|               | Realistic     | Artistic      | .584    | .637    | .085          | -                        |
|               | Realistic     | Social        | .584    | .405    | .239          | small                    |
|               | Realistic     | Enterprising  | .584    | .502    | .117          | small                    |
|               | Realistic     | Conventional  | .584    | .494    | .127          | small                    |
|               | Investigative | Artistic      | .490    | .637    | .217          | small                    |
|               | Investigative | Social        | .490    | .405    | .106          | small                    |
|               | Investigative | Enterprising  | .490    | .502    | .016          | -                        |
|               | Investigative | Conventional  | .490    | .494    | .005          | -                        |
|               | Artistic      | Social        | .637    | .405    | .323          | medium                   |
|               | Artistic      | Enterprising  | .637    | .502    | .201          | small                    |
|               | Artistic      | Conventional  | .637    | .494    | .212          | small                    |
|               | Social        | Enterprising  | .405    | .502    | .122          | small                    |
|               | Social        | Conventional  | .405    | .494    | .112          | small                    |
|               | Enterprising  | Conventional  | .502    | .494    | .011          | -                        |

|             |               |               |      |      |      |        |
|-------------|---------------|---------------|------|------|------|--------|
| <b>Eco</b>  | Realistic     | Investigative | .484 | .516 | .043 | -      |
|             | Realistic     | Artistic      | .484 | .680 | .301 | medium |
|             | Realistic     | Social        | .484 | .520 | .048 | -      |
|             | Realistic     | Enterprising  | .484 | .480 | .005 | -      |
|             | Realistic     | Conventional  | .484 | .440 | .056 | -      |
|             | Investigative | Artistic      | .516 | .680 | .258 | small  |
|             | Investigative | Social        | .516 | .520 | .005 | -      |
|             | Investigative | Enterprising  | .516 | .480 | .048 | -      |
|             | Investigative | Conventional  | .516 | .440 | .099 | -      |
|             | Artistic      | Social        | .680 | .520 | .253 | small  |
|             | Artistic      | Enterprising  | .680 | .480 | .306 | medium |
|             | Artistic      | Conventional  | .680 | .440 | .357 | medium |
|             | Social        | Enterprising  | .520 | .480 | .053 | -      |
|             | Social        | Conventional  | .520 | .440 | .104 | small  |
|             | Enterprising  | Conventional  | .480 | .440 | .051 | -      |
| <b>Edu</b>  | Realistic     | Investigative | .527 | .487 | .054 | -      |
|             | Realistic     | Artistic      | .527 | .677 | .238 | small  |
|             | Realistic     | Social        | .527 | .406 | .155 | small  |
|             | Realistic     | Enterprising  | .527 | .415 | .144 | small  |
|             | Realistic     | Conventional  | .527 | .437 | .117 | small  |
|             | Investigative | Artistic      | .487 | .677 | .291 | small  |
|             | Investigative | Social        | .487 | .406 | .101 | small  |
|             | Investigative | Enterprising  | .487 | .415 | .090 | -      |
|             | Investigative | Conventional  | .487 | .437 | .064 | -      |
|             | Artistic      | Social        | .677 | .406 | .393 | medium |
|             | Artistic      | Enterprising  | .677 | .415 | .382 | medium |
|             | Artistic      | Conventional  | .677 | .437 | .355 | medium |
|             | Social        | Enterprising  | .406 | .415 | .011 | -      |
|             | Social        | Conventional  | .406 | .437 | .038 | -      |
|             | Enterprising  | Conventional  | .415 | .437 | .027 | -      |
| <b>Lang</b> | Realistic     | Investigative | .542 | .530 | .017 | -      |
|             | Realistic     | Artistic      | .542 | .660 | .186 | small  |
|             | Realistic     | Social        | .542 | .483 | .080 | -      |
|             | Realistic     | Enterprising  | .542 | .444 | .130 | small  |
|             | Realistic     | Conventional  | .542 | .426 | .152 | small  |
|             | Investigative | Artistic      | .530 | .660 | .203 | small  |
|             | Investigative | Social        | .530 | .483 | .063 | -      |
|             | Investigative | Enterprising  | .530 | .444 | .113 | small  |
|             | Investigative | Conventional  | .530 | .426 | .135 | small  |
|             | Artistic      | Social        | .660 | .483 | .266 | small  |
|             | Artistic      | Enterprising  | .660 | .444 | .316 | medium |
|             | Artistic      | Conventional  | .660 | .426 | .338 | medium |
|             | Social        | Enterprising  | .483 | .444 | .050 | -      |
|             | Social        | Conventional  | .483 | .426 | .072 | -      |
|             | Enterprising  | Conventional  | .444 | .426 | .022 | -      |

Note: <sup>a</sup>: Non-directional Cohen's  $q$ ;

<sup>b</sup>: Effect sizes according to Cohen's Thresholds: small effect  $> .1$ , medium effect  $> .3$ , large effect  $> .5$



Supplement E3e: Effect sizes for the differences between the correlations of the different subject areas for male students. This table is just for comparability. We do not consider male students of education in this analysis because of the low sub-sample size. Supplement E3f shows the comparisons without male students of education.

| Dimension            | Area 1 | Area 2 | Corr. 1 | Corr. 2 | Cohen's q <sup>a</sup> | Effect size <sup>b</sup> |
|----------------------|--------|--------|---------|---------|------------------------|--------------------------|
| <b>Realistic</b>     | STEM-L | STEM-M | .547    | .583    | .053                   | -                        |
|                      | STEM-L | Life   | .547    | .499    | .066                   | -                        |
|                      | STEM-L | Eco    | .547    | .566    | .028                   | -                        |
|                      | STEM-L | Edu    | .547    | .569    | .032                   | -                        |
|                      | STEM-L | Lang   | .547    | .589    | .062                   | -                        |
|                      | STEM-M | Life   | .583    | .499    | .119                   | small                    |
|                      | STEM-M | Eco    | .583    | .566    | .025                   | -                        |
|                      | STEM-M | Edu    | .583    | .569    | .021                   | -                        |
|                      | STEM-M | Lang   | .583    | .589    | .009                   | -                        |
|                      | Life   | Eco    | .499    | .566    | .094                   | -                        |
|                      | Life   | Edu    | .499    | .569    | .098                   | -                        |
|                      | Life   | Lang   | .499    | .589    | .128                   | small                    |
|                      | Eco    | Edu    | .566    | .569    | .004                   | -                        |
|                      | Eco    | Lang   | .566    | .589    | .035                   | -                        |
|                      | Edu    | Lang   | .569    | .589    | .030                   | -                        |
| <b>Investigative</b> | STEM-L | STEM-M | .475    | .628    | .222                   | small                    |
|                      | STEM-L | Life   | .475    | .427    | .060                   | -                        |
|                      | STEM-L | Eco    | .475    | .470    | .006                   | -                        |
|                      | STEM-L | Edu    | .475    | .364    | .135                   | small                    |
|                      | STEM-L | Lang   | .475    | .593    | .166                   | small                    |
|                      | STEM-M | Life   | .628    | .427    | .282                   | small                    |
|                      | STEM-M | Eco    | .628    | .470    | .228                   | small                    |
|                      | STEM-M | Edu    | .628    | .364    | .357                   | medium                   |
|                      | STEM-M | Lang   | .628    | .593    | .056                   | -                        |
|                      | Life   | Eco    | .427    | .470    | .054                   | -                        |
|                      | Life   | Edu    | .427    | .364    | .075                   | -                        |
|                      | Life   | Lang   | .427    | .593    | .226                   | small                    |
|                      | Eco    | Edu    | .470    | .364    | .129                   | small                    |
|                      | Eco    | Lang   | .470    | .593    | .172                   | small                    |
|                      | Edu    | Lang   | .364    | .593    | .301                   | medium                   |
| <b>Artistic</b>      | STEM-L | STEM-M | .607    | .601    | .009                   | -                        |
|                      | STEM-L | Life   | .607    | .577    | .046                   | -                        |
|                      | STEM-L | Eco    | .607    | .588    | .030                   | -                        |
|                      | STEM-L | Edu    | .607    | .500    | .155                   | small                    |
|                      | STEM-L | Lang   | .607    | .673    | .112                   | small                    |
|                      | STEM-M | Life   | .601    | .577    | .037                   | -                        |
|                      | STEM-M | Eco    | .601    | .588    | .020                   | -                        |
|                      | STEM-M | Edu    | .601    | .500    | .145                   | small                    |
|                      | STEM-M | Lang   | .601    | .673    | .121                   | small                    |
|                      | Life   | Eco    | .577    | .588    | .017                   | -                        |
|                      | Life   | Edu    | .577    | .500    | .109                   | small                    |
|                      | Life   | Lang   | .577    | .673    | .158                   | small                    |
|                      | Eco    | Edu    | .588    | .500    | .125                   | small                    |
|                      | Eco    | Lang   | .588    | .673    | .142                   | small                    |

|                     |        |        |      |      |      |        |
|---------------------|--------|--------|------|------|------|--------|
|                     | Edu    | Lang   | .500 | .673 | .267 | small  |
| <b>Social</b>       | STEM-L | STEM-M | .536 | .539 | .004 | -      |
|                     | STEM-L | Life   | .536 | .480 | .076 | -      |
|                     | STEM-L | Eco    | .536 | .557 | .030 | -      |
|                     | STEM-L | Edu    | .536 | .046 | .552 | large  |
|                     | STEM-L | Lang   | .536 | .499 | .051 | -      |
|                     | STEM-M | Life   | .539 | .480 | .080 | -      |
|                     | STEM-M | Eco    | .539 | .557 | .026 | -      |
|                     | STEM-M | Edu    | .539 | .046 | .557 | large  |
|                     | STEM-M | Lang   | .539 | .499 | .055 | -      |
|                     | Life   | Eco    | .480 | .557 | .105 | small  |
|                     | Life   | Edu    | .480 | .046 | .477 | medium |
|                     | Life   | Lang   | .480 | .499 | .025 | -      |
|                     | Eco    | Edu    | .557 | .046 | .582 | large  |
|                     | Eco    | Lang   | .557 | .499 | .080 | -      |
|                     | Edu    | Lang   | .046 | .499 | .502 | large  |
| <b>Enterprising</b> | STEM-L | STEM-M | .502 | .502 | .000 | -      |
|                     | STEM-L | Life   | .502 | .544 | .058 | -      |
|                     | STEM-L | Eco    | .502 | .502 | .000 | -      |
|                     | STEM-L | Edu    | .502 | .347 | .190 | small  |
|                     | STEM-L | Lang   | .502 | .453 | .064 | -      |
|                     | STEM-M | Life   | .502 | .544 | .058 | -      |
|                     | STEM-M | Eco    | .502 | .502 | .000 | -      |
|                     | STEM-M | Edu    | .502 | .347 | .190 | small  |
|                     | STEM-M | Lang   | .502 | .453 | .064 | -      |
|                     | Life   | Eco    | .544 | .502 | .058 | -      |
|                     | Life   | Edu    | .544 | .347 | .248 | small  |
|                     | Life   | Lang   | .544 | .453 | .121 | small  |
|                     | Eco    | Edu    | .502 | .347 | .190 | small  |
|                     | Eco    | Lang   | .502 | .453 | .064 | -      |
|                     | Edu    | Lang   | .347 | .453 | .126 | small  |
| <b>Conventional</b> | STEM-L | STEM-M | .444 | .547 | .137 | small  |
|                     | STEM-L | Life   | .444 | .600 | .216 | small  |
|                     | STEM-L | Eco    | .444 | .512 | .088 | -      |
|                     | STEM-L | Edu    | .444 | .658 | .312 | medium |
|                     | STEM-L | Lang   | .444 | .561 | .157 | small  |
|                     | STEM-M | Life   | .547 | .600 | .079 | -      |
|                     | STEM-M | Eco    | .547 | .512 | .049 | -      |
|                     | STEM-M | Edu    | .547 | .658 | .175 | small  |
|                     | STEM-M | Lang   | .547 | .561 | .020 | -      |
|                     | Life   | Eco    | .600 | .512 | .128 | small  |
|                     | Life   | Edu    | .600 | .658 | .096 | -      |
|                     | Life   | Lang   | .600 | .561 | .059 | -      |
|                     | Eco    | Edu    | .512 | .658 | .224 | small  |
|                     | Eco    | Lang   | .512 | .561 | .069 | -      |
|                     | Edu    | Lang   | .658 | .561 | .155 | small  |

Note: <sup>a</sup>: Non-directional Cohen's  $q$ ;

<sup>b</sup>: Effect sizes according to Cohen's Thresholds: small effect  $> .1$ , medium effect  $> .3$ , large effect  $> .5$

Supplement E3f: Effect sizes for the differences between the correlations of the different subject areas for male students excluding the area of education

| <b>Dimension</b>     | <b>Area 1</b> | <b>Area 2</b> | <b>Corr. 1</b> | <b>Corr. 2</b> | <b>Cohen's q<sup>a</sup></b> | <b>Effect size<sup>b</sup></b> |
|----------------------|---------------|---------------|----------------|----------------|------------------------------|--------------------------------|
| <b>Realistic</b>     | STEM-L        | STEM-M        | .547           | .583           | .053                         | -                              |
|                      | STEM-L        | Life          | .547           | .499           | .066                         | -                              |
|                      | STEM-L        | Eco           | .547           | .566           | .028                         | -                              |
|                      | STEM-L        | Lang          | .547           | .589           | .062                         | -                              |
|                      | STEM-M        | Life          | .583           | .499           | .119                         | small                          |
|                      | STEM-M        | Eco           | .583           | .566           | .025                         | -                              |
|                      | STEM-M        | Lang          | .583           | .589           | .009                         | -                              |
|                      | Life          | Eco           | .499           | .566           | .094                         | -                              |
|                      | Life          | Lang          | .499           | .589           | .128                         | small                          |
|                      | Eco           | Lang          | .566           | .589           | .035                         | -                              |
| <b>Investigative</b> | STEM-L        | STEM-M        | .475           | .628           | .222                         | small                          |
|                      | STEM-L        | Life          | .475           | .427           | .060                         | -                              |
|                      | STEM-L        | Eco           | .475           | .470           | .006                         | -                              |
|                      | STEM-L        | Lang          | .475           | .593           | .166                         | small                          |
|                      | STEM-M        | Life          | .628           | .427           | .282                         | small                          |
|                      | STEM-M        | Eco           | .628           | .470           | .228                         | small                          |
|                      | STEM-M        | Lang          | .628           | .593           | .056                         | -                              |
|                      | Life          | Eco           | .427           | .470           | .054                         | -                              |
|                      | Life          | Lang          | .427           | .593           | .226                         | small                          |
|                      | Eco           | Lang          | .470           | .593           | .172                         | small                          |
| <b>Artistic</b>      | STEM-L        | STEM-M        | .607           | .601           | .009                         | -                              |
|                      | STEM-L        | Life          | .607           | .577           | .046                         | -                              |
|                      | STEM-L        | Eco           | .607           | .588           | .030                         | -                              |
|                      | STEM-L        | Lang          | .607           | .673           | .112                         | small                          |
|                      | STEM-M        | Life          | .601           | .577           | .037                         | -                              |
|                      | STEM-M        | Eco           | .601           | .588           | .020                         | -                              |
|                      | STEM-M        | Lang          | .601           | .673           | .121                         | small                          |
|                      | Life          | Eco           | .577           | .588           | .017                         | -                              |
|                      | Life          | Lang          | .577           | .673           | .158                         | small                          |
|                      | Eco           | Lang          | .588           | .673           | .142                         | small                          |
| <b>Social</b>        | STEM-L        | STEM-M        | .536           | .539           | .004                         | -                              |
|                      | STEM-L        | Life          | .536           | .480           | .076                         | -                              |
|                      | STEM-L        | Eco           | .536           | .557           | .030                         | -                              |
|                      | STEM-L        | Lang          | .536           | .499           | .051                         | -                              |
|                      | STEM-M        | Life          | .539           | .480           | .080                         | -                              |
|                      | STEM-M        | Eco           | .539           | .557           | .026                         | -                              |
|                      | STEM-M        | Lang          | .539           | .499           | .055                         | -                              |
|                      | Life          | Eco           | .480           | .557           | .105                         | small                          |
|                      | Life          | Lang          | .480           | .499           | .025                         | -                              |
|                      | Eco           | Lang          | .557           | .499           | .080                         | -                              |
| <b>Enterprising</b>  | STEM-L        | STEM-M        | .502           | .502           | .000                         | -                              |
|                      | STEM-L        | Life          | .502           | .544           | .058                         | -                              |
|                      | STEM-L        | Eco           | .502           | .502           | .000                         | -                              |
|                      | STEM-L        | Lang          | .502           | .453           | .064                         | -                              |
|                      | STEM-M        | Life          | .502           | .544           | .058                         | -                              |

## Stability of Vocational Interests – ESM 1

|                     |        |        |      |      |      |       |
|---------------------|--------|--------|------|------|------|-------|
|                     | STEM-M | Eco    | .502 | .502 | .000 | -     |
|                     | STEM-M | Lang   | .502 | .453 | .064 | -     |
|                     | Life   | Eco    | .544 | .502 | .058 | -     |
|                     | Life   | Lang   | .544 | .453 | .121 | small |
|                     | Eco    | Lang   | .502 | .453 | .064 | -     |
| <b>Conventional</b> | STEM-L | STEM-M | .444 | .547 | .137 | small |
|                     | STEM-L | Life   | .444 | .600 | .216 | small |
|                     | STEM-L | Eco    | .444 | .512 | .088 | -     |
|                     | STEM-L | Lang   | .444 | .561 | .157 | small |
|                     | STEM-M | Life   | .547 | .600 | .079 | -     |
|                     | STEM-M | Eco    | .547 | .512 | .049 | -     |
|                     | STEM-M | Lang   | .547 | .561 | .020 | -     |
|                     | Life   | Eco    | .600 | .512 | .128 | small |
|                     | Life   | Lang   | .600 | .561 | .059 | -     |
|                     | Eco    | Lang   | .512 | .561 | .069 | -     |

Note: <sup>a</sup>: Non-directional Cohen's  $q$ ;

<sup>b</sup>: Effect sizes according to Cohen's Thresholds: small effect  $> .1$ , medium effect  $> .3$ , large effect  $> .5$

Supplement E3g: Effect sizes for the differences between the correlations of the different subject areas for female students

| Dimension            | Area 1 | Area 2 | Corr. 1 | Corr. 2 | Cohen's $q^a$ | Effect size <sup>b</sup> |
|----------------------|--------|--------|---------|---------|---------------|--------------------------|
| <b>Realistic</b>     | STEM-L | STEM-M | .513    | .503    | .013          | -                        |
|                      | STEM-L | Life   | .513    | .584    | .102          | small                    |
|                      | STEM-L | Eco    | .513    | .484    | .039          | -                        |
|                      | STEM-L | Edu    | .513    | .527    | .019          | -                        |
|                      | STEM-L | Lang   | .513    | .542    | .040          | -                        |
|                      | STEM-M | Life   | .503    | .584    | .115          | small                    |
|                      | STEM-M | Eco    | .503    | .484    | .025          | -                        |
|                      | STEM-M | Edu    | .503    | .527    | .033          | -                        |
|                      | STEM-M | Lang   | .503    | .542    | .054          | -                        |
|                      | Life   | Eco    | .584    | .484    | .140          | small                    |
|                      | Life   | Edu    | .584    | .527    | .083          | -                        |
|                      | Life   | Lang   | .584    | .542    | .062          | -                        |
|                      | Eco    | Edu    | .484    | .527    | .058          | -                        |
|                      | Eco    | Lang   | .484    | .542    | .079          | -                        |
|                      | Edu    | Lang   | .527    | .542    | .021          | -                        |
| <b>Investigative</b> | STEM-L | STEM-M | .542    | .654    | .175          | small                    |
|                      | STEM-L | Life   | .542    | .490    | .071          | -                        |
|                      | STEM-L | Eco    | .542    | .516    | .036          | -                        |
|                      | STEM-L | Edu    | .542    | .487    | .075          | -                        |
|                      | STEM-L | Lang   | .542    | .530    | .017          | -                        |
|                      | STEM-M | Life   | .654    | .490    | .246          | small                    |
|                      | STEM-M | Eco    | .654    | .516    | .211          | small                    |
|                      | STEM-M | Edu    | .654    | .487    | .250          | small                    |
|                      | STEM-M | Lang   | .654    | .530    | .192          | small                    |
|                      | Life   | Eco    | .490    | .516    | .035          | -                        |
|                      | Life   | Edu    | .490    | .487    | .004          | -                        |
|                      | Life   | Lang   | .490    | .530    | .054          | -                        |
|                      | Eco    | Edu    | .516    | .487    | .039          | -                        |
|                      | Eco    | Lang   | .516    | .530    | .019          | -                        |
|                      | Edu    | Lang   | .487    | .530    | .058          | -                        |
| <b>Artistic</b>      | STEM-L | STEM-M | .587    | .676    | .149          | small                    |
|                      | STEM-L | Life   | .587    | .637    | .080          | -                        |
|                      | STEM-L | Eco    | .587    | .680    | .156          | small                    |
|                      | STEM-L | Edu    | .587    | .677    | .150          | small                    |
|                      | STEM-L | Lang   | .587    | .660    | .120          | small                    |
|                      | STEM-M | Life   | .676    | .637    | .069          | -                        |
|                      | STEM-M | Eco    | .676    | .680    | .007          | -                        |
|                      | STEM-M | Edu    | .676    | .677    | .002          | -                        |
|                      | STEM-M | Lang   | .676    | .660    | .029          | -                        |
|                      | Life   | Eco    | .637    | .680    | .076          | -                        |
|                      | Life   | Edu    | .637    | .677    | .070          | -                        |
|                      | Life   | Lang   | .637    | .660    | .040          | -                        |
|                      | Eco    | Edu    | .680    | .677    | .006          | -                        |
|                      | Eco    | Lang   | .680    | .660    | .036          | -                        |
|                      | Edu    | Lang   | .677    | .660    | .031          | -                        |

|                     |                     |        |        |      |      |       |
|---------------------|---------------------|--------|--------|------|------|-------|
| <b>Social</b>       | STEM-L              | STEM-M | .563   | .563 | .000 | -     |
|                     | STEM-L              | Life   | .563   | .405 | .208 | small |
|                     | STEM-L              | Eco    | .563   | .520 | .061 | -     |
|                     | STEM-L              | Edu    | .563   | .406 | .206 | small |
|                     | STEM-L              | Lang   | .563   | .483 | .110 | small |
|                     | STEM-M              | Life   | .563   | .405 | .208 | small |
|                     | STEM-M              | Eco    | .563   | .520 | .061 | -     |
|                     | STEM-M              | Edu    | .563   | .406 | .206 | small |
|                     | STEM-M              | Lang   | .563   | .483 | .110 | small |
|                     | Life                | Eco    | .405   | .520 | .147 | small |
|                     | Life                | Edu    | .405   | .406 | .001 | -     |
|                     | Life                | Lang   | .405   | .483 | .097 | -     |
|                     | Eco                 | Edu    | .520   | .406 | .146 | small |
|                     | Eco                 | Lang   | .520   | .483 | .049 | -     |
|                     | Edu                 | Lang   | .406   | .483 | .096 | -     |
|                     | <b>Enterprising</b> | STEM-L | STEM-M | .511 | .489 | .029  |
| STEM-L              |                     | Life   | .511   | .502 | .012 | -     |
| STEM-L              |                     | Eco    | .511   | .480 | .041 | -     |
| STEM-L              |                     | Edu    | .511   | .415 | .122 | small |
| STEM-L              |                     | Lang   | .511   | .444 | .087 | -     |
| STEM-M              |                     | Life   | .489   | .502 | .017 | -     |
| STEM-M              |                     | Eco    | .489   | .480 | .012 | -     |
| STEM-M              |                     | Edu    | .489   | .415 | .093 | -     |
| STEM-M              |                     | Lang   | .489   | .444 | .058 | -     |
| Life                |                     | Eco    | .502   | .480 | .029 | -     |
| Life                |                     | Edu    | .502   | .415 | .110 | small |
| Life                |                     | Lang   | .502   | .444 | .075 | -     |
| Eco                 |                     | Edu    | .480   | .415 | .081 | -     |
| Eco                 |                     | Lang   | .480   | .444 | .046 | -     |
| Edu                 |                     | Lang   | .415   | .444 | .036 | -     |
| <b>Conventional</b> |                     | STEM-L | STEM-M | .485 | .462 | .030  |
|                     | STEM-L              | Life   | .485   | .494 | .012 | -     |
|                     | STEM-L              | Eco    | .485   | .440 | .057 | -     |
|                     | STEM-L              | Edu    | .485   | .437 | .061 | -     |
|                     | STEM-L              | Lang   | .485   | .426 | .075 | -     |
|                     | STEM-M              | Life   | .462   | .494 | .041 | -     |
|                     | STEM-M              | Eco    | .462   | .440 | .028 | -     |
|                     | STEM-M              | Edu    | .462   | .437 | .031 | -     |
|                     | STEM-M              | Lang   | .462   | .426 | .045 | -     |
|                     | Life                | Eco    | .494   | .440 | .069 | -     |
|                     | Life                | Edu    | .494   | .437 | .073 | -     |
|                     | Life                | Lang   | .494   | .426 | .086 | -     |
|                     | Eco                 | Edu    | .440   | .437 | .004 | -     |
|                     | Eco                 | Lang   | .440   | .426 | .017 | -     |
|                     | Edu                 | Lang   | .437   | .426 | .014 | -     |

Note: <sup>a</sup>: Non-directional Cohen's  $q$ ;

<sup>b</sup>: Effect sizes according to Cohen's Thresholds: small effect  $> .1$ , medium effect  $> .3$ , large effect  $> .5$

Supplement E3h: Effect sizes for the differences between the profile correlations of the different subject areas for male students. This table is just for comparability. We do not consider male students of education in this analysis because of the low sub-sample size. Supplement E3i shows the comparisons without male students of education.

| Area 1 | Area 2 | Corr. 1 | Corr. 2 | Cohen's q <sup>a</sup> | Effect size <sup>b</sup> |
|--------|--------|---------|---------|------------------------|--------------------------|
| STEM-L | STEM-M | .754    | .743    | .025                   | -                        |
| STEM-L | Life   | .754    | .812    | -.151                  | small                    |
| STEM-L | Eco    | .754    | .747    | .016                   | -                        |
| STEM-L | Edu    | .754    | .806    | -.133                  | small                    |
| STEM-L | Lang   | .754    | .739    | .034                   | -                        |
| STEM-M | Life   | .743    | .812    | -.176                  | small                    |
| STEM-M | Eco    | .743    | .747    | -.009                  | -                        |
| STEM-M | Edu    | .743    | .806    | -.158                  | small                    |
| STEM-M | Lang   | .743    | .739    | .009                   | -                        |
| Life   | Eco    | .812    | .747    | .167                   | small                    |
| Life   | Edu    | .812    | .806    | .017                   | -                        |
| Life   | Lang   | .812    | .739    | .185                   | small                    |
| Eco    | Edu    | .747    | .806    | -.149                  | small                    |
| Eco    | Lang   | .747    | .739    | .018                   | -                        |
| Edu    | Lang   | .806    | .739    | .167                   | small                    |

Note: <sup>a</sup>: Non-directional Cohen's q;

<sup>b</sup>: Effect sizes according to Cohen's Thresholds: small effect > .1, medium effect >.3, large effect >.5

Supplement E3i: Effect sizes for the differences between the profile correlations of the different subject areas for male students without education

| Area 1 | Area 2 | Corr. 1 | Corr. 2 | Cohen's q <sup>a</sup> | Effect size <sup>b</sup> |
|--------|--------|---------|---------|------------------------|--------------------------|
| STEM-L | STEM-M | .757    | .743    | .032                   | -                        |
| STEM-L | Life   | .757    | .812    | -.144                  | small                    |
| STEM-L | Eco    | .757    | .747    | .023                   | -                        |
| STEM-L | Lang   | .757    | .739    | .041                   | -                        |
| STEM-M | Life   | .743    | .812    | -.176                  | small                    |
| STEM-M | Eco    | .743    | .747    | -.009                  | -                        |
| STEM-M | Lang   | .743    | .739    | .009                   | -                        |
| Life   | Eco    | .812    | .747    | .167                   | small                    |
| Life   | Lang   | .812    | .739    | .185                   | small                    |
| Eco    | Lang   | .747    | .739    | .018                   | -                        |

Note: <sup>a</sup>: Non-directional Cohen's q;

<sup>b</sup>: Effect sizes according to Cohen's Thresholds: small effect > .1, medium effect >.3, large effect >.5

Supplement E3j: Effect sizes for the differences between the profile correlations of the different subject areas for female students

| Area 1 | Area 2 | Corr. 1 | Corr. 2 | Cohen's q <sup>a</sup> | Effect size <sup>b</sup> |
|--------|--------|---------|---------|------------------------|--------------------------|
| STEM-L | STEM-M | .679    | .731    | -.104                  | small                    |
| STEM-L | Life   | .679    | .826    | -.348                  | medium                   |
| STEM-L | Eco    | .679    | .711    | -.062                  | -                        |
| STEM-L | Edu    | .679    | .835    | -.377                  | medium                   |
| STEM-L | Lang   | .679    | .776    | -.208                  | small                    |
| STEM-M | Life   | .731    | .826    | -.245                  | small                    |
| STEM-M | Eco    | .731    | .711    | .042                   | -                        |
| STEM-M | Edu    | .731    | .835    | -.274                  | small                    |
| STEM-M | Lang   | .731    | .776    | -.104                  | small                    |
| Life   | Eco    | .826    | .711    | .286                   | small                    |
| Life   | Edu    | .826    | .835    | -.029                  | -                        |
| Life   | Lang   | .826    | .776    | .140                   | small                    |
| Eco    | Edu    | .711    | .835    | -.315                  | medium                   |
| Eco    | Lang   | .711    | .776    | -.146                  | small                    |
| STEM-L | STEM-M | .835    | .776    | .169                   | small                    |

Note: <sup>a</sup>: Non-directional Cohen's q;

<sup>b</sup>: Effect sizes according to Cohen's Thresholds: small effect > .1, medium effect >.3, large effect >.5

Supplement E3k: Effect sizes for the differences of the profile correlations between male and female students of the different subject areas

| Area   | Ref. 1 | Ref. 2 | Corr. 1 | Corr. 2 | Cohen's q <sup>a</sup> | Effect size <sup>b</sup> |
|--------|--------|--------|---------|---------|------------------------|--------------------------|
| STEM-L | Male   | Female | .754    | .679    | .155                   | small                    |
| STEM-M | Male   | Female | .743    | .731    | .026                   | -                        |
| Life   | Male   | Female | .812    | .826    | -.043                  | -                        |
| Eco    | Male   | Female | .747    | .711    | .077                   | -                        |
| Edu    | Male   | Female | .806    | .835    | -.089                  | -                        |
| Lang   | Male   | Female | .739    | .776    | -.087                  | -                        |

Note: <sup>a</sup>: Non-directional Cohen's q;

<sup>b</sup>: Effect sizes according to Cohen's Thresholds: small effect > .1, medium effect >.3, large effect >.5



Supplement E4: Overview on the model parameters for the analyses from 3 to 25 profiles including information about replicability of the best log-likelihood value (repl.), model fit indices (AIC, BIC, and Sample-size adjusted BIC), size of the biggest profile (Size), Entropy of the solution, the minimum for average latent profile probabilities, adjusted Lo-Mendell-Rubin Test (LMR), and bootstrapped likelihood ratio test (BLRT)

| # Profiles | Repl. | AIC       | BIC       | SBIC      | Size    | Entropy | Min.  | LMR   | BLRT   |
|------------|-------|-----------|-----------|-----------|---------|---------|-------|-------|--------|
| 3          | Yes   | 79610.316 | 79783.965 | 79701.344 | 83.00 % | 0.596   | 0.732 | < .01 | < .001 |
| 4          | Yes   | 79516.143 | 79736.543 | 79631.678 | 80.00 % | 0.614   | 0.651 | > .1  | < .001 |
| 5          | Yes   | 79440.955 | 79708.107 | 79580.998 | 79.00 % | 0.646   | 0.674 | > .1  | < .001 |
| 6          | Yes   | 79372.834 | 79686.737 | 79537.385 | 72.35 % | 0.629   | 0.635 | > .1  | < .001 |
| 7          | Yes   | 79326.333 | 79686.989 | 79515.392 | 70.31 % | 0.594   | 0.565 | > .1  | < .001 |
| 8          | Yes   | 79281.718 | 79689.125 | 79475.284 | 71.31 % | 0.629   | 0.578 | > .1  | < .001 |
| 9          | Yes   | 79241.962 | 79696.12  | 79480.036 | 69.97 % | 0.632   | 0.575 | > .1  | < .001 |
| 10         | Yes   | 79215.787 | 79716.697 | 79478.368 | 69.47 % | 0.644   | 0.579 | > .1  | < .001 |
| 11         | Yes   | 79189.217 | 79736.879 | 79476.306 | 69.20 % | 0.661   | 0.581 | > .1  | < .001 |
| 12         | Yes   | 79163.698 | 79758.111 | 79475.294 | 68.40 % | 0.666   | 0.578 | > .1  | < .001 |
| 13         | No    | 79141.838 | 79783.003 | 79477.942 | 68.32 % | 0.673   | 0.581 | > .1  | < .001 |
| 14         | Yes   | 79122.355 | 79810.271 | 79482.967 | 67.67 % | 0.674   | 0.579 | > .1  | < .001 |
| 15         | No    | 79104.514 | 79839.182 | 79489.633 | 67.01 % | 0.683   | 0.578 | > .1  | < .05  |
| 16         | No    | 79086.069 | 79867.488 | 79475.696 | 67.18 % | 0.682   | 0.583 | > .1  | < .001 |
| 17         | No    | 79072.976 | 79901.148 | 79507.111 | 66.46 % | 0.688   | 0.582 | > .1  | < .1   |
| 18         | No    | 79054.301 | 79929.224 | 79512.944 | 66.17 % | 0.678   | 0.581 | > .1  | < .001 |
| 19         | No    | 79042.602 | 79964.276 | 79525.752 | 65.60 % | 0.672   | 0.565 | > .1  | < .1   |
| 20         | No    | 79033.022 | 80001.448 | 79540.68  | 65.48 % | 0.682   | 0.576 | > .1  | < .1   |
| 21         | No    | 79022.470 | 80037.648 | 79554.636 | 65.00 % | 0.686   | 0.571 | > .1  | < .1   |
| 22         | No    | 79013.759 | 80075.688 | 79570.432 | 58.13 % | 0.657   | 0.510 | > .1  | > .1   |
| 23         | No    | 79001.452 | 80110.133 | 79582.632 | 64.52 % | 0.688   | 0.574 | > .1  | > .1   |
| 24         | No    | 78995.210 | 80150.643 | 79600.898 | 61.38 % | 0.679   | 0.563 | > .1  | > .1   |
| 25         | No    | 78990.057 | 80192.241 | 79620.253 | 45.82 % | 0.654   | 0.533 | > .1  | > .1   |

Supplement E5a: Standardized differences in interests between wave 1 and wave 9 for all students and separated for male and female students. Z-Scores.

|        | Realistic | Investigative | Artistic | Social | Enterprising | Conventional |
|--------|-----------|---------------|----------|--------|--------------|--------------|
| Total  | .000      | .000          | .000     | .000   | .000         | .000         |
| Male   | -.027     | .073          | .071     | .035   | .076         | -.026        |
| Female | .019      | -.052         | -.051    | -.025  | -.054        | .019         |

Supplement E5b: Absolute differences in interests between wave 1 and wave 9 for all students and separated for male and female students. Range: -4 for a maximum in decrease and 4 for a maximum in increase between wave 1 and wave 9.

|        | Realistic | Investigative | Artistic | Social | Enterprising | Conventional |
|--------|-----------|---------------|----------|--------|--------------|--------------|
| Total  | .104      | -.135         | -.164    | -.118  | -.309        | -.050        |
| Male   | .083      | -.078         | -.111    | -.092  | -.253        | -.071        |
| Female | .119      | -.175         | -.201    | -.136  | -.349        | -.035        |

Supplement E5c: Means and standard deviations for the six interest dimensions at wave 1 and wave 9 for each profile.

|           |        | Realistic |           | Investigative |           | Artistic |           | Social   |           | Enterprising |           | Conventional |           |
|-----------|--------|-----------|-----------|---------------|-----------|----------|-----------|----------|-----------|--------------|-----------|--------------|-----------|
|           |        | <i>M</i>  | <i>SD</i> | <i>M</i>      | <i>SD</i> | <i>M</i> | <i>SD</i> | <i>M</i> | <i>SD</i> | <i>M</i>     | <i>SD</i> | <i>M</i>     | <i>SD</i> |
| Profile 1 | Wave 1 | 2.460     | 0.859     | 2.981         | 1.003     | 2.817    | 0.988     | 4.132    | 0.719     | 4.145        | 0.597     | 3.043        | 0.846     |
| SEC loss  | Wave 9 | 3.463     | 0.925     | 3.110         | 0.989     | 2.912    | 0.920     | 3.202    | 0.834     | 2.522        | 0.611     | 2.272        | 0.755     |
| Profile 2 | Wave 1 | 2.911     | 0.919     | 3.185         | 0.898     | 2.866    | 0.969     | 3.657    | 0.871     | 3.400        | 0.701     | 2.769        | 0.753     |
| Stable    | Wave 9 | 2.887     | 0.880     | 2.977         | 0.902     | 2.608    | 0.945     | 3.459    | 0.855     | 3.057        | 0.717     | 2.676        | 0.783     |
| Profile 3 | Wave 1 | 2.622     | 0.866     | 2.946         | 0.918     | 2.631    | 0.966     | 3.360    | 0.921     | 3.191        | 0.735     | 2.511        | 0.741     |
| I. Gain   | Wave 9 | 3.481     | 0.865     | 3.416         | 0.925     | 2.959    | 1.005     | 3.735    | 0.862     | 3.306        | 0.751     | 3.005        | 0.828     |
| Profile 4 | Wave 1 | 3.242     | 0.899     | 3.581         | 0.892     | 3.140    | 0.997     | 4.078    | 0.802     | 3.788        | 0.653     | 3.319        | 0.787     |
| I. Loss   | Wave 9 | 2.499     | 0.842     | 2.575         | 0.837     | 2.409    | 0.966     | 3.207    | 0.851     | 2.621        | 0.681     | 2.320        | 0.736     |
| Profile 5 | Wave 1 | 3.263     | 0.958     | 3.421         | 0.959     | 2.606    | 1.058     | 2.751    | 0.790     | 2.740        | 0.678     | 2.725        | 0.855     |
| SE gain   | Wave 9 | 2.722     | 0.921     | 3.010         | 0.831     | 2.772    | 1.130     | 3.963    | 0.763     | 3.643        | 0.728     | 2.706        | 0.870     |
| Profile 6 | Wave 1 | 2.195     | 0.680     | 3.111         | 0.790     | 2.723    | 1.111     | 2.833    | 0.968     | 2.931        | 0.885     | 1.972        | 0.810     |
| RASEC b.  | Wave 9 | 4.222     | 0.595     | 3.056         | 0.916     | 3.597    | 0.748     | 4.153    | 0.722     | 3.681        | 0.764     | 3.847        | 0.694     |

Supplement E5d: Bar-chart representation of the six profiles

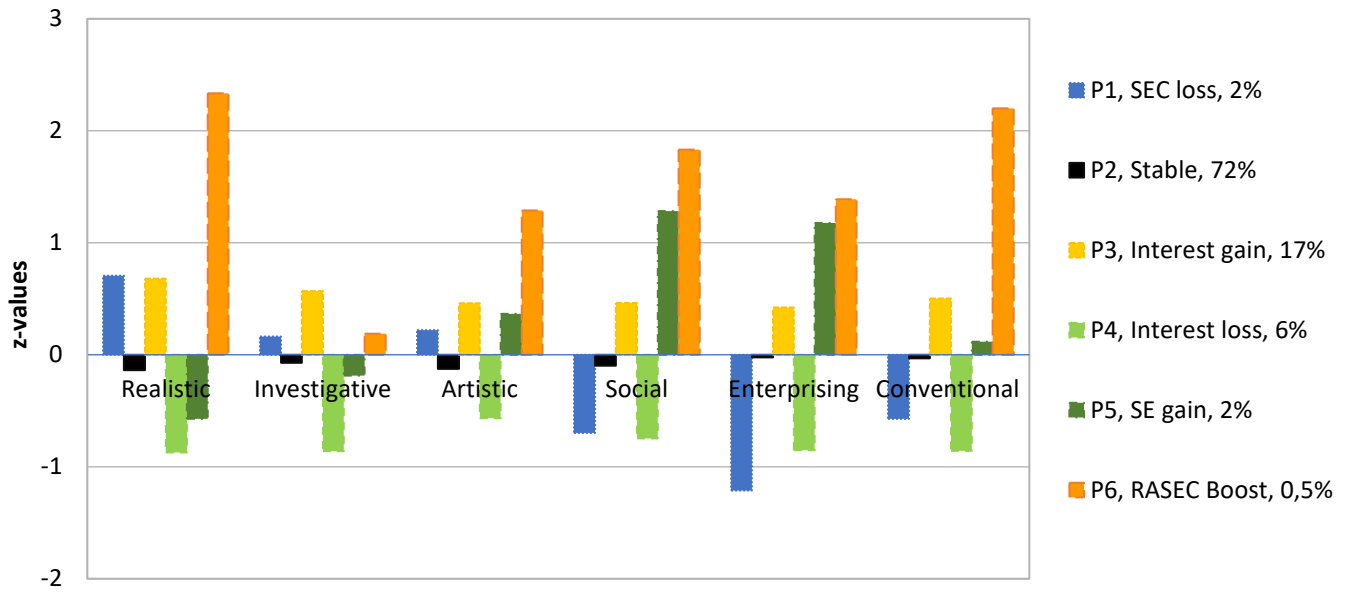

Supplement E5e: Bar-chart representation of profile 1: SEC loss

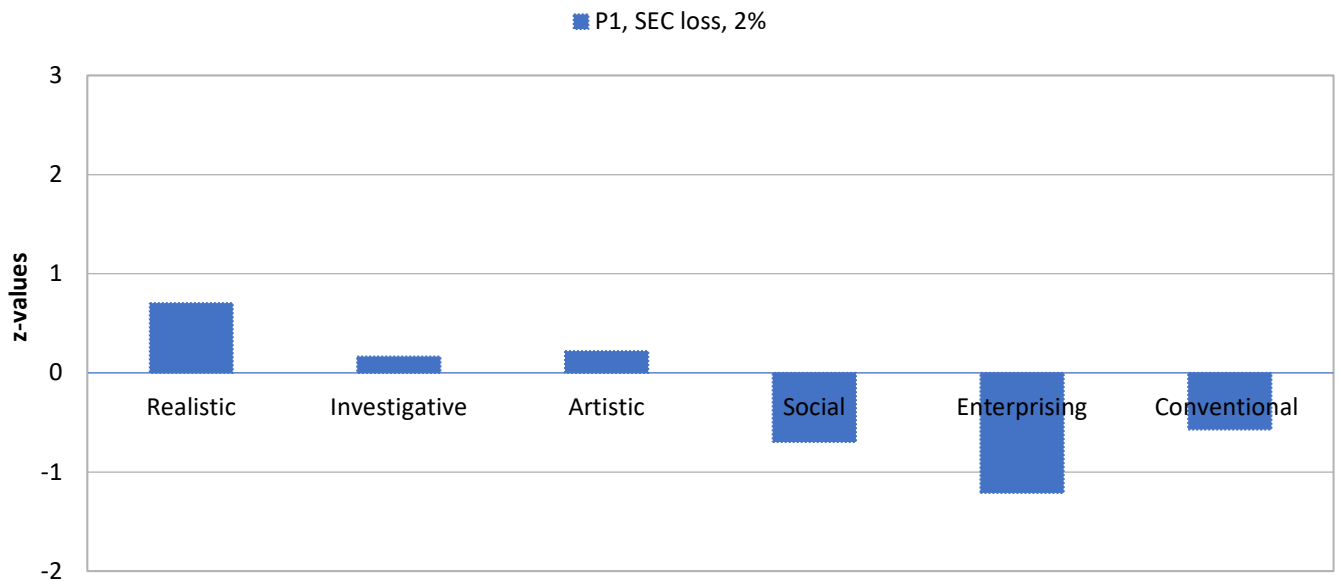

Supplement E5f: Bar-chart representation of profile 2: Stable

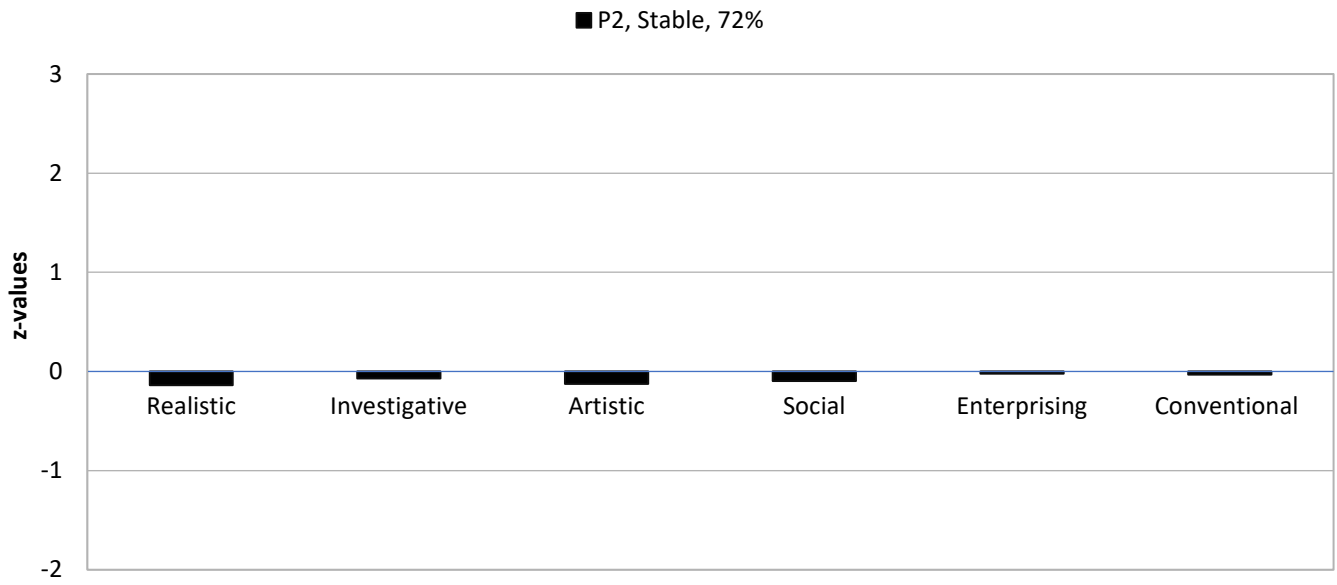

Supplement E5g: Bar-chart representation of profile 3: Interest gain

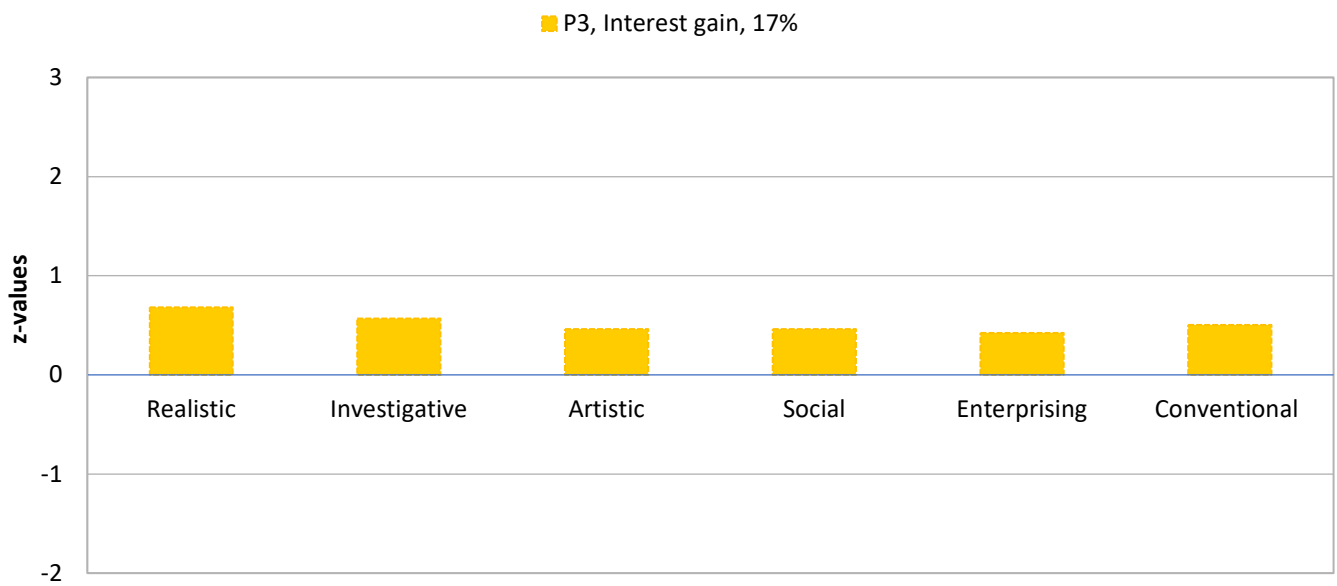

Supplement E5h: Bar-chart representation of profile 4: Interest loss

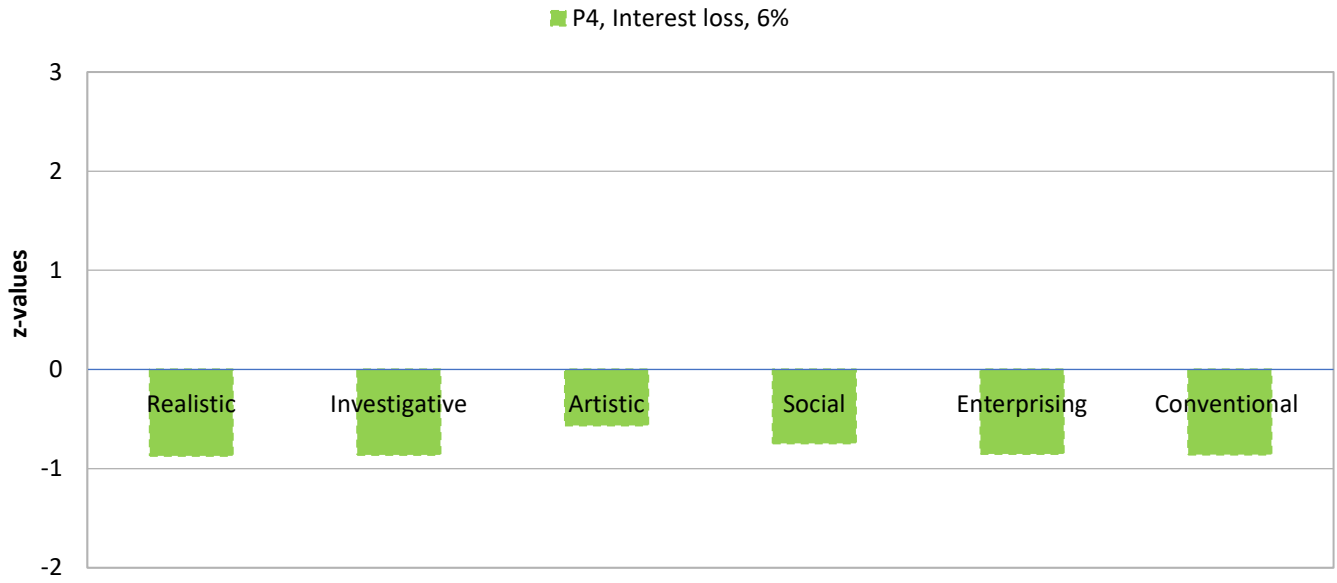

Supplement E5i: Bar-chart representation of profile 5: SE gain

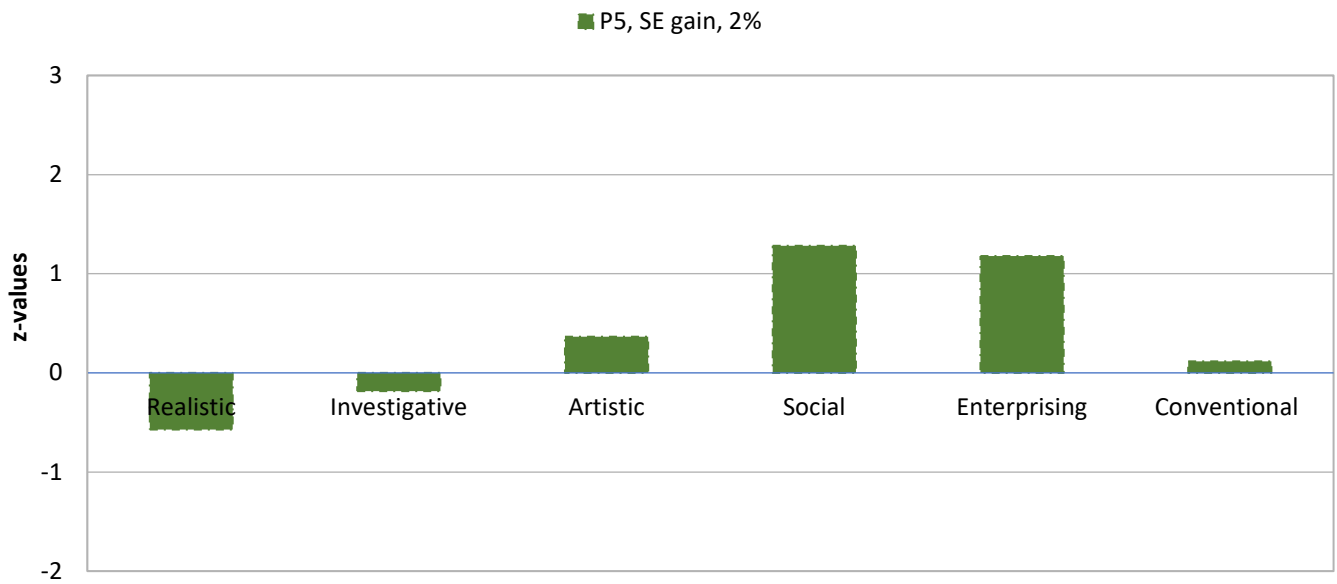

Supplement E5j: Bar-chart representation of profile 6: RASEC Boost

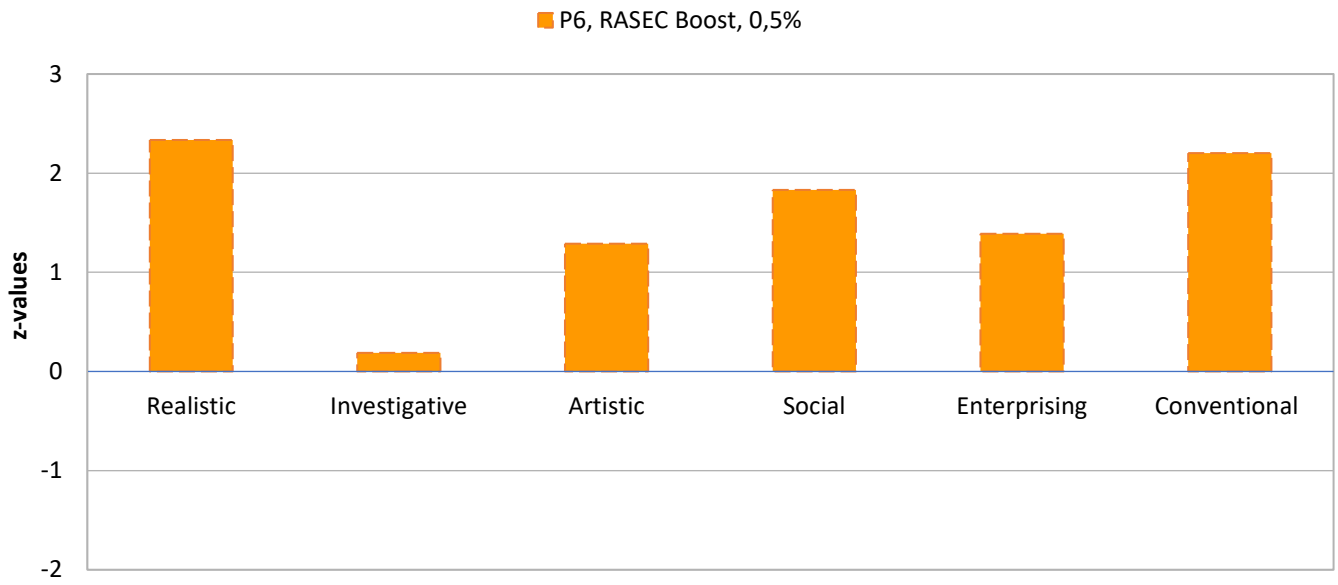

Supplement E6: Modelling interest stability by a latent variable approach and by regressing the latent interest variables in wave 9 on the respective latent interest variables in wave 1 for the whole sample. Supplement E6a provides the respective model parameters, supplement E6b the R<sup>2</sup>s and beta weights of the regressions, and supplement E6c visualizes the covariances of the latent variables at wave 1 and wave 9

E6a: Model parameters

N= 5859; X<sup>2</sup><sub>(558)</sub> = 17290,138; p < .001; RMSEA = .072 [.071; .072]; CFI = .771; TLI = .741; SRMR = .076; Baseline Model: X<sup>2</sup><sub>(630)</sub> = 73662.733; p < .001

E6b: R<sup>2</sup>s, regression weights, standard errors, and 95% confidence intervals for the regression weights

|              | R <sup>2</sup> | S.E. (R <sup>2</sup> ) | Stand. β | S.E. (β) | LCI  | UCI  |
|--------------|----------------|------------------------|----------|----------|------|------|
| R w9 on R w1 | .809           | .015                   | .900     | .008     | .883 | .916 |
| I w9 on I w1 | .700           | .014                   | .837     | .009     | .820 | .854 |
| A w9 on A w1 | .825           | .014                   | .908     | .008     | .893 | .923 |
| S w9 on S w1 | .704           | .014                   | .839     | .008     | .823 | .855 |
| E w9 on E w1 | .750           | .028                   | .866     | .016     | .834 | .898 |
| C w9 on C w1 | .663           | .025                   | .814     | .016     | .784 | .845 |

E6c: Covariances between the latent variables at wave 1 and wave 9

Covariances of the latent interest dimensions of all students at wave1 (left) and wave 9 (right). Red lines indicate negative covariances.

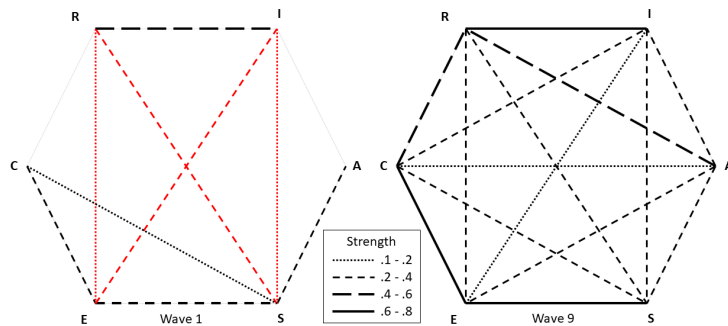

Supplement E7: Modelling interest stability by a latent variable approach and by regressing the latent interest variables in wave 9 on the respective latent interest variables in wave 1 for male students. Supplement E7a provides the respective model parameters, supplement E7b the R<sup>2</sup>s and beta weights of the regressions, and supplement E7c visualizes the covariances of the latent variables at wave 1 and wave 9

E7a: Model parameters

N = 2435;  $X^2_{(558)} = 7059.277$ ;  $p < .001$ ; RMSEA = .069 [.068; .071]; CFI = .759; TLI = .728; SRMR = .073; Baseline Model:  $X^2_{(630)} = 27613.681$ ;  $p < .001$

E7b: R<sup>2</sup>s, regression weights, standard errors, and 95% confidence intervals for the regression weights

|              | R <sup>2</sup> | S.E. (R <sup>2</sup> ) | Stand. $\beta$ | S.E. ( $\beta$ ) | LCI  | UCI  |
|--------------|----------------|------------------------|----------------|------------------|------|------|
| R w9 on R w1 | .764           | .023                   | .874           | .013             | .848 | .900 |
| I w9 on I w1 | .679           | .025                   | .824           | .015             | .794 | .854 |
| A w9 on A w1 | .825           | .032                   | .908           | .018             | .874 | .943 |
| S w9 on S w1 | .630           | .023                   | .794           | .014             | .765 | .822 |
| E w9 on E w1 | .756           | .042                   | .869           | .024             | .822 | .917 |
| C w9 on C w1 | .713           | .041                   | .844           | .024             | .796 | .892 |

E7c: Covariances between the latent variables at wave 1 and wave 9

Covariances of the latent interest dimensions of *male* students at wave1 (left) and wave 9 (right). Red lines indicate negative covariances.

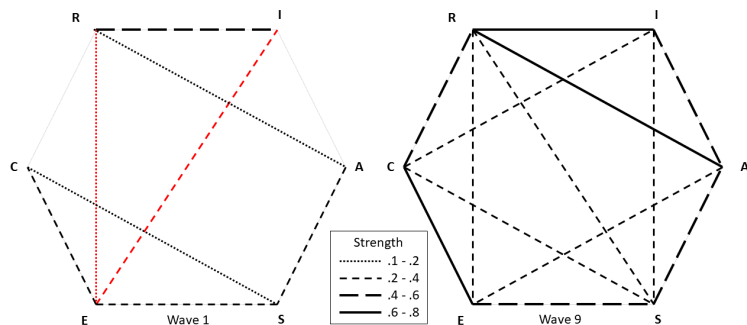



Supplement E8: Modelling interest stability by a latent variable approach and by regressing the latent interest variables in wave 9 on the respective latent interest variables in wave 1 for the female students. Supplement E8a provides the respective model parameters, supplement E8b the R<sup>2</sup>s and beta weights of the regressions, and supplement E8c visualizes the covariances of the latent variables at wave 1 and wave 9

E8a: Model parameters

$N = 3424$ ;  $X^2_{(558)} = 9393.407$ ;  $p < .001$ ; RMSEA = .068 [.067; .069]; CFI = .775; TLI = .746; SRMR = .071; Baseline Model:  $X^2_{(630)} = 39980.247$ ;  $p < .001$

E8b: R<sup>2</sup>s, regression weights, standard errors, and 95% confidence intervals for the regression weights

|              | R <sup>2</sup> | S.E. (R <sup>2</sup> ) | Stand. $\beta$ | S.E. ( $\beta$ ) | LCI  | UCI  |
|--------------|----------------|------------------------|----------------|------------------|------|------|
| R w9 on R w1 | .760           | .026                   | .872           | .015             | .843 | .900 |
| I w9 on I w1 | .690           | .016                   | .831           | .010             | .812 | .849 |
| A w9 on A w1 | .769           | .017                   | .877           | .010             | .858 | .896 |
| S w9 on S w1 | .645           | .021                   | .803           | .013             | .777 | .829 |
| E w9 on E w1 | .749           | .038                   | .865           | .022             | .823 | .908 |
| C w9 on C w1 | .611           | .031                   | .781           | .020             | .742 | .821 |

E8c: Covariances between the latent variables at wave 1 and wave 9

Covariances of the latent interest dimensions of *female* students at wave1 (left) and wave 9 (right). Red lines indicate negative covariances.

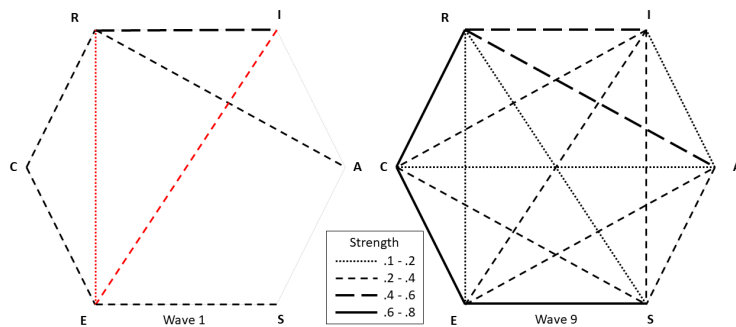

Supplement E9: Overview on the mean level differences, effect sizes, and confidence intervals

Supplement E9a: Means of the six interest dimensions for wave 1 and wave 9 for the total sample

|        | Realistic | Investigative | Artistic | Social | Enterprising | Conventional |
|--------|-----------|---------------|----------|--------|--------------|--------------|
| Wave1  | 2.876     | 3.168         | 2.834    | 3.618  | 3.387        | 2.758        |
| Wave 9 | 2.981     | 3.033         | 2.670    | 3.500  | 3.078        | 2.709        |

Supplement E9b: Effect sizes of the mean differences of the six interest dimensions for wave 1 and wave 9 for the total sample

|                  | Realistic | Investigative | Artistic | Social | Enterprising | Conventional |
|------------------|-----------|---------------|----------|--------|--------------|--------------|
| Cohen's <i>d</i> | -0.135    | 0.173         | 0.222    | 0.160  | 0.419        | 0.062        |

Supplement E9c: Means of the six interest dimensions for wave 1 and wave 9 for male and female students

|        |        | Realistic | Investigative | Artistic | Social | Enterprising | Conventional |
|--------|--------|-----------|---------------|----------|--------|--------------|--------------|
| Male   | Wave 1 | 3.252     | 3.348         | 2.383    | 3.229  | 3.363        | 2.677        |
|        | Wave 9 | 3.335     | 3.270         | 2.271    | 3.137  | 3.110        | 2.606        |
| Female | Wave 1 | 2.609     | 3.040         | 3.155    | 3.894  | 3.404        | 2.816        |
|        | Wave 9 | 2.728     | 2.864         | 2.954    | 3.758  | 3.055        | 2.782        |

Supplement E9d: Effect sizes of the mean differences of the six interest dimensions for wave 1 and wave 9 for male and female students

|        |                  | Realistic | Investigative | Artistic | Social | Enterprising | Conventional |
|--------|------------------|-----------|---------------|----------|--------|--------------|--------------|
| Male   | Cohen's <i>d</i> | -0.106    | 0.098         | 0.156    | 0.122  | 0.346        | 0.091        |
| Female | Cohen's <i>d</i> | -0.156    | 0.229         | 0.267    | 0.189  | 0.472        | 0.042        |

Supplement E9e: Confidence intervals of the effect sizes of the mean differences of the six interest dimensions for wave 1 and wave 9 for the total sample as well as male and female students

|        | Realistic |         | Investigative |         | Artistic |         | Social  |         | Enterprising |         | Conventional |         |
|--------|-----------|---------|---------------|---------|----------|---------|---------|---------|--------------|---------|--------------|---------|
|        | 95% LCI   | 95% UCI | 95% LCI       | 95% UCI | 95% LCI  | 95% UCI | 95% LCI | 95% UCI | 95% LCI      | 95% UCI | 95% LCI      | 95% UCI |
| Total  | -0.161    | -0.109  | 0.147         | 0.199   | 0.196    | 0.248   | 0.135   | 0.186   | 0.392        | 0.446   | 0.036        | 0.087   |
| Male   | -0.146    | -0.066  | 0.058         | 0.138   | 0.117    | 0.196   | 0.082   | 0.162   | 0.305        | 0.387   | 0.052        | 0.131   |
| Female | -0.190    | -0.123  | 0.195         | 0.263   | 0.233    | 0.301   | 0.155   | 0.223   | 0.437        | 0.507   | 0.008        | 0.075   |

Supplement E9f: Means of the six interest dimensions for wave 1 and wave 9 for male students of the six study areas

|                  |        | Realistic | Investigative | Artistic | Social | Enterprising | Conventional |
|------------------|--------|-----------|---------------|----------|--------|--------------|--------------|
| STEM-L           | Wave 1 | 3.663     | 3.436         | 2.293    | 2.975  | 3.225        | 2.603        |
|                  | Wave 9 | 3.646     | 3.373         | 2.172    | 2.937  | 3.012        | 2.552        |
| STEM-M           | Wave 1 | 2.971     | 3.583         | 2.329    | 3.374  | 3.387        | 2.810        |
|                  | Wave 9 | 3.115     | 3.448         | 2.253    | 3.214  | 3.076        | 2.700        |
| Med              | Wave 1 | 2.841     | 3.858         | 2.559    | 4.342  | 3.390        | 2.391        |
|                  | Wave 9 | 3.176     | 3.627         | 2.422    | 4.060  | 3.188        | 2.382        |
| Eco              | Wave 1 | 2.530     | 2.630         | 2.256    | 3.110  | 3.763        | 2.935        |
|                  | Wave 9 | 2.755     | 2.656         | 2.120    | 3.040  | 3.438        | 2.856        |
| Edu <sup>a</sup> | Wave 1 | 2.626     | 2.870         | 3.032    | 4.382  | 3.471        | 2.464        |
|                  | Wave 9 | 2.927     | 2.659         | 2.789    | 4.186  | 3.211        | 2.407        |
| Lang             | Wave 1 | 2.537     | 2.885         | 3.079    | 3.833  | 3.659        | 2.702        |
|                  | Wave 9 | 2.758     | 2.842         | 3.015    | 3.658  | 3.365        | 2.568        |

<sup>a</sup>: We do not consider male students of education in this analysis because of the low sub-sample size.

Supplement E9g: Effect sizes of the mean differences of the six interest dimensions for wave 1 and wave 9 for male students of the six study areas

|                  |                  | Realistic | Investigative | Artistic | Social | Enterprising | Conventional |
|------------------|------------------|-----------|---------------|----------|--------|--------------|--------------|
| STEM-L           | Cohen's <i>d</i> | 0.022     | 0.079         | 0.172    | 0.050  | 0.292        | 0.064        |
| STEM-M           | Cohen's <i>d</i> | -0.188    | 0.169         | 0.106    | 0.205  | 0.421        | 0.143        |
| Med              | Cohen's <i>d</i> | -0.400    | 0.267         | 0.179    | 0.468  | 0.313        | 0.013        |
| Eco              | Cohen's <i>d</i> | -0.298    | -0.039        | 0.185    | 0.096  | 0.454        | 0.099        |
| Edu <sup>a</sup> | Cohen's <i>d</i> | -0.345    | 0.271         | 0.284    | 0.226  | 0.336        | 0.101        |
| Lang             | Cohen's <i>d</i> | -0.287    | 0.057         | 0.093    | 0.241  | 0.392        | 0.181        |

<sup>a</sup>: We do not consider male students of education in this analysis because of the low sub-sample size.

Supplement E9h: Confidence intervals of the effect sizes of the mean differences of the six interest dimensions for wave 1 and wave 9 for male students of the six study areas

|                  | Realistic |         | Investigative |         | Artistic |         | Social  |         | Enterprising |         | Conventional |         |
|------------------|-----------|---------|---------------|---------|----------|---------|---------|---------|--------------|---------|--------------|---------|
|                  | 95% LCI   | 95% UCI | 95% LCI       | 95% UCI | 95% LCI  | 95% UCI | 95% LCI | 95% UCI | 95% LCI      | 95% UCI | 95% LCI      | 95% UCI |
| STEM-L           | -0.032    | 0.076   | 0.025         | 0.133   | 0.118    | 0.227   | -0.004  | 0.104   | 0.237        | 0.347   | 0.010        | 0.118   |
| STEM-M           | -0.276    | -0.101  | 0.081         | 0.256   | 0.019    | 0.193   | 0.117   | 0.293   | 0.331        | 0.511   | 0.055        | 0.229   |
| Med              | -0.588    | -0.211  | 0.082         | 0.450   | -0.004   | 0.361   | 0.276   | 0.658   | 0.127        | 0.498   | -0.168       | 0.194   |
| Eco              | -0.422    | -0.174  | -0.160        | 0.082   | 0.063    | 0.307   | -0.026  | 0.218   | 0.326        | 0.581   | -0.023       | 0.220   |
| Edu <sup>a</sup> | -0.659    | -0.028  | -0.042        | 0.581   | -0.030   | 0.595   | -0.086  | 0.534   | 0.019        | 0.649   | -0.206       | 0.408   |
| Lang             | -0.431    | -0.141  | -0.086        | 0.199   | -0.050   | 0.235   | 0.096   | 0.385   | 0.244        | 0.539   | 0.038        | 0.325   |

<sup>a</sup>: We do not consider male students of education in this analysis because of the low sub-sample size.

Supplement E9i: Means of the six interest dimensions for wave 1 and wave 9 for female students of the six study areas

|        |        | Realistic | Investigative | Artistic | Social | Enterprising | Conventional |
|--------|--------|-----------|---------------|----------|--------|--------------|--------------|
| STEM-L | Wave 1 | 3.390     | 3.467         | 2.786    | 3.209  | 3.088        | 2.795        |
|        | Wave 9 | 3.307     | 3.257         | 2.649    | 3.244  | 2.871        | 2.825        |
| STEM-M | Wave 1 | 2.736     | 3.487         | 2.963    | 3.841  | 3.300        | 2.915        |
|        | Wave 9 | 2.879     | 3.285         | 2.755    | 3.666  | 2.946        | 2.879        |
| Med    | Wave 1 | 2.550     | 3.694         | 3.087    | 4.522  | 3.270        | 2.425        |
|        | Wave 9 | 2.780     | 3.344         | 2.988    | 4.296  | 2.915        | 2.581        |
| Eco    | Wave 1 | 2.375     | 2.516         | 2.853    | 3.403  | 3.632        | 2.992        |
|        | Wave 9 | 2.542     | 2.463         | 2.621    | 3.338  | 3.140        | 2.898        |
| Edu    | Wave 1 | 2.397     | 2.681         | 3.157    | 4.429  | 3.441        | 2.607        |
|        | Wave 9 | 2.462     | 2.506         | 2.958    | 4.199  | 3.102        | 2.579        |
| Lang   | Wave 1 | 2.418     | 2.665         | 3.585    | 4.028  | 3.531        | 2.825        |
|        | Wave 9 | 2.555     | 2.517         | 3.359    | 3.898  | 3.198        | 2.748        |

Supplement E9j: Effect sizes of the mean differences of the six interest dimensions for wave 1 and wave 9 for female students of the six study areas

|        |                  | Realistic | Investigative | Artistic | Social | Enterprising | Conventional |
|--------|------------------|-----------|---------------|----------|--------|--------------|--------------|
| STEM-L | Cohen's <i>d</i> | 0.103     | 0.254         | 0.162    | -0.045 | 0.282        | -0.035       |
| STEM-M | Cohen's <i>d</i> | -0.186    | 0.245         | 0.282    | 0.245  | 0.505        | 0.044        |
| Med    | Cohen's <i>d</i> | -0.326    | 0.453         | 0.120    | 0.382  | 0.519        | -0.197       |
| Eco    | Cohen's <i>d</i> | -0.216    | 0.075         | 0.309    | 0.084  | 0.668        | 0.110        |
| Edu    | Cohen's <i>d</i> | -0.088    | 0.264         | 0.274    | 0.341  | 0.451        | 0.035        |
| Lang   | Cohen's <i>d</i> | -0.183    | 0.199         | 0.314    | 0.183  | 0.435        | 0.092        |

Supplement E9k: Confidence intervals of the effect sizes of the mean differences of the six interest dimensions for wave 1 and wave 9 for female students of the six study areas

|        | <b>Realistic</b> |         | <b>Investigative</b> |         | <b>Artistic</b> |         | <b>Social</b> |         | <b>Enterprising</b> |         | <b>Conventional</b> |         |
|--------|------------------|---------|----------------------|---------|-----------------|---------|---------------|---------|---------------------|---------|---------------------|---------|
|        | 95% LCI          | 95% UCI | 95% LCI              | 95% UCI | 95% LCI         | 95% UCI | 95% LCI       | 95% UCI | 95% LCI             | 95% UCI | 95% LCI             | 95% UCI |
| STEM-L | -0.003           | 0.208   | 0.146                | 0.361   | 0.056           | 0.268   | -0.151        | 0.060   | 0.174               | 0.389   | -0.141              | 0.071   |
| STEM-M | -0.249           | -0.123  | 0.182                | 0.308   | 0.218           | 0.345   | 0.182         | 0.309   | 0.439               | 0.571   | -0.019              | 0.106   |
| Med    | -0.455           | -0.196  | 0.321                | 0.585   | -0.006          | 0.247   | 0.251         | 0.513   | 0.384               | 0.653   | -0.324              | -0.070  |
| Eco    | -0.313           | -0.119  | -0.021               | 0.172   | 0.210           | 0.407   | -0.012        | 0.180   | 0.561               | 0.774   | 0.013               | 0.206   |
| Edu    | -0.190           | 0.014   | 0.160                | 0.367   | 0.170           | 0.378   | 0.235         | 0.445   | 0.344               | 0.558   | -0.067              | 0.137   |
| Lang   | -0.243           | -0.122  | 0.138                | 0.260   | 0.252           | 0.375   | 0.122         | 0.243   | 0.372               | 0.498   | 0.032               | 0.152   |

Supplement E10: Selectivity analysis: *F*-Values, significances, and partial  $\eta^2$ s for an ANOVA comparing gender, persistence, and interests at wave 1 of students that were still present at wave 9 with students that were no more present at wave 9.

|                                         | <i>F</i> <sub>(1,10210)</sub> | Sig. | Partial $\eta^2$ |
|-----------------------------------------|-------------------------------|------|------------------|
| <b>Gender</b>                           | .193                          | .660 | .000             |
| <b>Study persistence initial course</b> | 3112.715                      | .000 | .234             |
| <b>Realistic Interests</b>              | 2.804                         | .094 | .000             |
| <b>Investigative Interests</b>          | 14.760                        | .000 | .001             |
| <b>Artistic Interests</b>               | 7.406                         | .007 | .001             |
| <b>Social Interests</b>                 | .756                          | .385 | .000             |
| <b>Enterprising Interests</b>           | .547                          | .460 | .000             |
| <b>Conventional Interests</b>           | 3.254                         | .071 | .000             |
